# Supplementary material for: Photochemistry of norharmane in aqueous solution
Source: Royal Society of Chemistry journal article supplement (doi:10.1039/b822173a), 2009-05-15
Supplement: b822173a.pdf [file b822173a.pdf]

### Supplementary Information

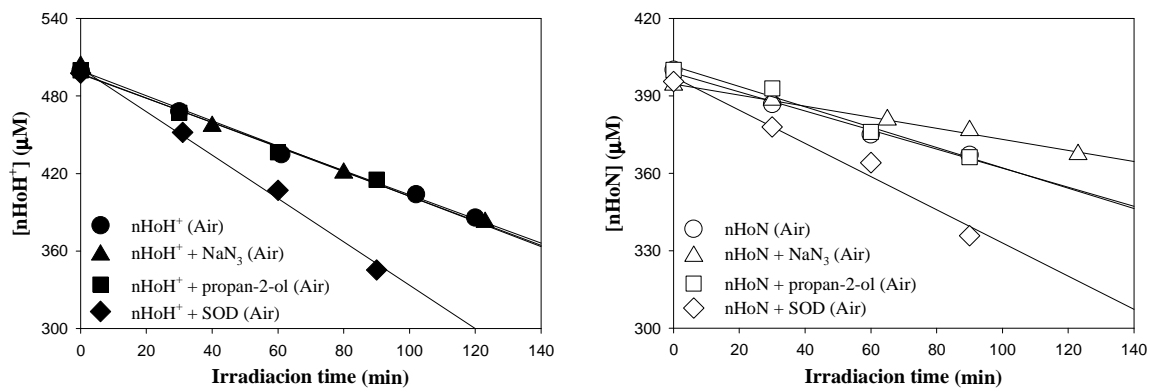

**Fig. 1** HPLC analysis of nHoH<sup>+</sup> and nHoN concentration evolution as a function of irradiation time (UV-A (350 nm)). Experiments performed from air-equilibrated aqueous solutions in the presence and in the absence of different ROS scavengers.

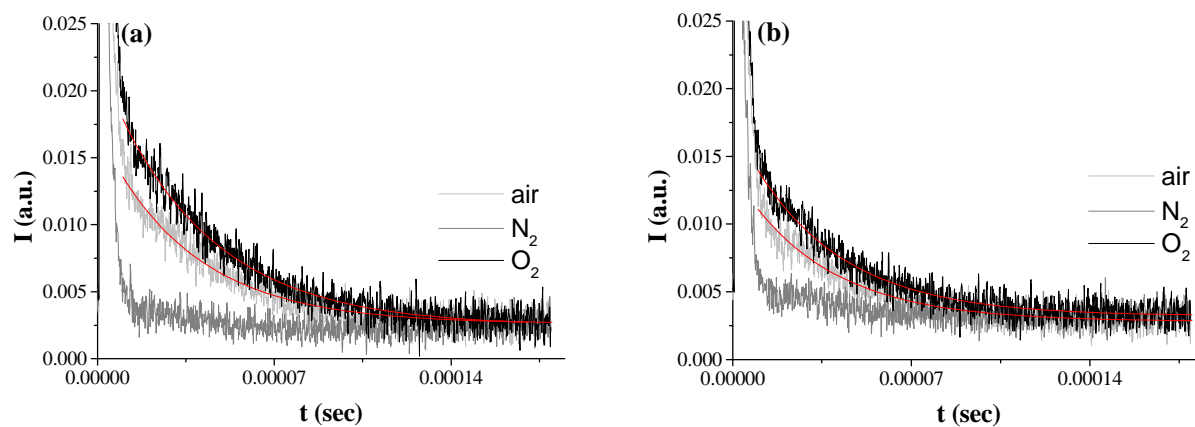

**Fig. 2** Phosphorescence decay traces of  $^1\text{O}_2$ , observed at 1270 nm after excitation of norharmane  $\text{D}_2\text{O}$  solutions, under different atmospheres. Red line: fit to a first-order decay kinetic. Experiments carried out at (a) pH 5 and (a) pH 10.

*Electron Ionization–Mass Spectrometry (EI-MS)*. An air-equilibrated aqueous solution (pH = 5) of norharmane was over night irradiated and analyzed by EI-MS. As it is shown in the spectrum obtained, several peaks with different m/z ratio were detected. The signal with m/z = 334 corresponds to the dimmer molecular ion. The signal with m/z ratio of 167 is characteristic of norharmane dimers<sup>1</sup>, which suffer as main fragmentation M-167 yielding the ion with m/z = 167 (norharmane m.w., 168 Da; norharmane – H = 167 Da). Other signals can be assigned taking into account the characteristic fragmentation pattern of  $\beta$ -carbolines previously described<sup>2</sup>. The major fragmentation pathway of these molecules is the successive loss of CN<sup>-</sup> and HCN moieties to give abundant ions at m/z = 308 and 281.

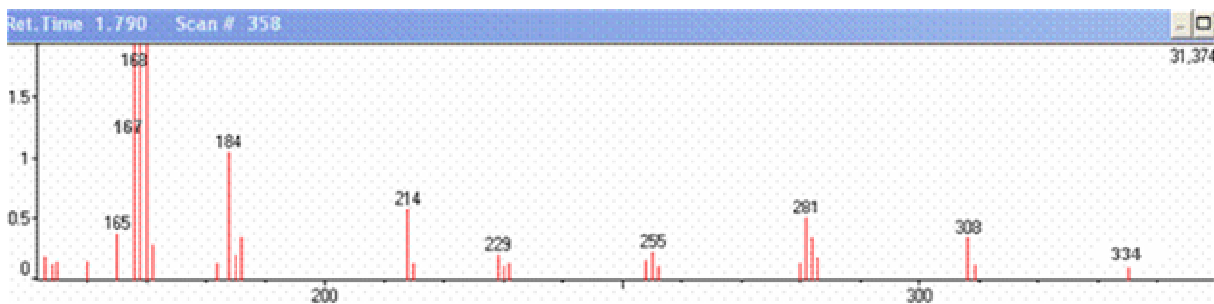

**Fig. 3** EI-MS of the solid residue obtained after irradiation of aqueous solution of norharmane (pH = 5).

[1] R. Erra-Balsells and A.R. Frasca, *Tetrahedron*, 1983, **39** 33-39.

[2] R.T. Coutts, R.A. Locock and G.W.A.Slywka, *Organic Mass Spectrometry*, 1970, **3**, 879-889
